# Supplementary material
Source: publisher figshare collection journal article supplement (https://gsapubs.figshare.com/ndownloader/files/40896431)
Supplement: Supplementary file 1 [file 40896431]

## Sheet: Trace elements MIs
		LHR9	LHR9	LHR9	LHR9	LHR9	LHR9	LHR9	LHR9		LHR9	LHR9	LHR9	LHR9	LHR9	LHR9	LHR9		LHR9
inclusion type		NI	NI	NI	NI	NI	NI	NI	NI		glass	glass	glass	glass	glass	glass	glass		Garnet
Analysis		sample-8	sample-10	sample-12	sample-13	sample-27	sample-4	sample-5	sample-7		sample-24	sample-1	sample-29	sample-7	sample-25	sample-1	sample-2		(average)
Li (7)		27.4115	15.3745	39.4181	b.d.l.	43.4578	14.8762	b.d.l.	27.2382		44.5215	46.7733	22.3825	15.7137	56.7043	26.1036	43.3886		8.72
Sc (45)		72.5906	b.d.l.	b.d.l.	0	b.d.l.	b.d.l.	b.d.l.	b.d.l.		b.d.l.	b.d.l.	b.d.l.	b.d.l.	b.d.l.	b.d.l.	b.d.l.		131.86
V (51)		94.4894	b.d.l.	b.d.l.	132.018	b.d.l.	b.d.l.	b.d.l.	b.d.l.		b.d.l.	b.d.l.	874.081	b.d.l.	b.d.l.	b.d.l.	b.d.l.		155
Cr (53)		0	b.d.l.	b.d.l.	222.417	b.d.l.	b.d.l.	b.d.l.	b.d.l.		b.d.l.	b.d.l.	b.d.l.	b.d.l.	b.d.l.	b.d.l.	b.d.l.		220
Co (59)		71.7355	b.d.l.	b.d.l.	b.d.l.	b.d.l.	b.d.l.	b.d.l.	b.d.l.		b.d.l.	b.d.l.	b.d.l.	b.d.l.	b.d.l.	b.d.l.	b.d.l.		65.8
Ni (60)		22.5119	10.6727	80.8612	b.d.l.	12.7515	b.d.l.	b.d.l.	27.1417		8.30989	b.d.l.	b.d.l.	b.d.l.	b.d.l.	b.d.l.	b.d.l.		3.4
Cu (65)		b.d.l.	b.d.l.	113.075	b.d.l.	b.d.l.	b.d.l.	b.d.l.	b.d.l.		b.d.l.	b.d.l.	17.9526	b.d.l.	b.d.l.	b.d.l.	b.d.l.		b.d.l.
Zn (66)		355.776	b.d.l.	b.d.l.	233.98	274.302	b.d.l.	b.d.l.	377.191		b.d.l.	b.d.l.	b.d.l.	542.098	b.d.l.	46.2058	b.d.l.		164.96
Ga (71)		b.d.l.	27.2124	36.4701	27.569	21.547	22.7476	22.7259	35.3049		32.0066	20.274	b.d.l.	51.6562	28.5138	38.0242	37.1629		13.2
Rb (85)		146.834	262.451	504.624	332.398	198.285	330.872	348.096	369.228		539.199	645.296	441.471	385.101	533.622	1085.74	711.661		b.d.l.
Sr (88)		15.9031	9.38283	17.6252	19.449	24.727	48.3229	20.8585	13.3852		11.7989	8.19062	23.8949	6.88438	15.0686	27.0842	15.1416		0.079
Zr (90)		100.351	52.8106	42.5129	376.847	80.8263	99.3316	86.1336	46.3068		33.6126	249.762	321.839	32.2635	46.9772	203.599	68.3244		20.6
Cs (133)		15.3676	16.9874	36.8661	41.6126	14.4841	10.3108	18.93	32.0913		26.0165	89.9339	40.6919	45.3277	30.2501	141.981	43.7854		b.d.l.
Ba (137)		250.07	466.617	774.627	567.987	441.821	263.191	313.572	225.37		395.293	462.346	570.257	890.207	377.591	228.859	226.04		b.d.l.
La (139)		0.78303	3.5611	0.34587	1.50313	3.1993	0.068046	b.d.l.	5.97321		0.0850196	0.396221	1.18515	0.234944	4.42201	116.21	0		0.022
Ce (140)		3.43409	8.80156	0.176136	11.7644	10.4797	0.0483638	0.103843	13.0142		0	1.22437	3.28807	0.4089	9.36356	313.288	0		0.048
Hf (178)		1.77664	3.30824	3.71778	7.23427	0	1.64967	2.74657	2.0992		0.930344	9.14063	11.0027	7.26843	1.0935	8.16712	1.44196		0.478
Pb (208)		3.05184	3.95518	10.1461	0	3.18019	3.55002	5.67872	2.34934		5.8325	3.10951	7.5074	1.37873	6.54592	9.06651	6.03525		b.d.l.
Th (232)		0.984534	0.576174	b.d.l.	2.84296	1.74343	0.189579	0	8.65724		0.111417	0	0.0962246	0	1.45461	41.4623	0.471216		0.021
U (238)		3.347	3.16418	1.62608	6.11356	4.44668	3.77119	1.89135	3.12896		2.02457	4.68477	8.37578	1.55684	2.85763	13.218	1.45204		0.04
TZrsat (°C)		802 ± 46	750 ± 42	734 ± 46	931 ± 57	784 ± 45	801 ± 46	789 ± 45	739 ± 41		716 ± 40	888 ± 53	918 ± 56	712 ± 39	741 ± 41	868 ± 52	770 ± 44
Ga/Al			3.99009	5.34752	4.04238	3.15938	3.33542	3.33225	5.17667		4.69305	2.97272		7.57423	4.18091	5.5754	5.4491
Table S3: Trace element composition (ppm) of glassy melt inclusions and nanogranitoids. Numbers in brackets [e.g. Li (7)] are the measured isotopes. TZrsat are zirconium saturation temperatures (Crisp and Berry, 2022).
Crisp, L. J., & Berry, A. J. (2022). A new model for zircon saturation in silicate melts. Contributions to Mineralogy and Petrology, 177(7), 71.

## Sheet: Quality control
		G_BCR2G	G_BCR2G	Average BCR2G 25 mic (2) [ppm]	1 sigma	RSD %	LOD		G_BCR2G	G_BCR2G	G_BCR2G	G_BCR2G	Average BCR2G 12 mic (4) [ppm]	1 sigma	RSD %	LOD		Accepted Value [ppm]
		25 [µm]	25 [µm]						12 [µm]	12 [µm]	12 [µm]	12 [µm]
Li (7)		9.03382	9.70762	9.37072	0.47645	5.08445	1.04936		8.24501	10.1324	9.70816	9.52051	9.40152	0.81238	8.64095	2.20637		9
Sc (45)		37.8078	36.6008	37.2043	0.853488	2.29406	0.957211		34.6426	38.8777	36.1932	36.8286	36.6355	1.75425	4.78839	2.18401		33
V (51)		444.494	441.875	443.184	1.8518	0.41784	0.882328		373.151	444.777	446.868	443.204	427	35.9306	8.41466	1.69002		425
Cr (53)		14.0264	16.2007	15.1135	1.53743	10.1726	5.60645		14.9253	17.0379	18.3821	19.6758	17.5053	2.02937	11.5929	12.1943		17
Co (59)		37.2047	38.5413	37.873	0.945133	2.49553	0.471796		40.0239	41.3282	35.256	39.9897	39.1494	2.66938	6.81843	1.21555		38
Ni (60)		13.6913	12.7007	13.196	0.700513	5.30852	1.96117		11.0127	10.8295	14.3859	10.7301	11.7395	1.7681	15.0611	3.58959		13
Cu (65)		19.2127	17.4652	18.339	1.23563	6.73774	1.31502		17.1171	17.8029	18.2283	17.5478	17.674	0.465474	2.63366	3.19011		21
Zn (66)		142.347	130.358	136.352	8.47756	6.21739	1.61204		127.753	154.343	147.311	141.726	142.783	11.272	7.89448	4.14141		125
Ga (71)		25.8902	24.8773	25.3838	0.716248	2.82168	0.5516		22.2652	24.7881	23.8814	24.1408	23.7689	1.07251	4.51226	1.24028		23
Rb (85)		52.187	52.3191	52.2531	0.0933597	0.178668	0.397232		51.5895	52.8844	51.7347	53.1161	52.3312	0.780576	1.49161	0.897361		48
Sr (88)		328.161	328.616	328.389	0.321645	0.0979466	0.0348913		309.943	334.891	324.621	343.428	328.221	14.4081	4.38975	0.0934416		342
Zr (90)		167.153	172.07	169.611	3.47698	2.04997	0.050447		157.559	166.495	157.527	170.981	163.14	6.71784	4.11783	0.22681		184
Cs (133)		1.23182	1.14562	1.18872	0.0609525	5.12759	0.0769829		0.959164	1.13689	1.28805	1.07968	1.11595	0.136569	12.238	0.176523		1.16
Ba (137)		693.058	676.933	684.995	11.4018	1.66451	0.0618871		553.181	694.186	691.681	677.325	654.093	67.6837	10.3477	0.437766		683
La (139)		24.8719	25.8359	25.3539	0.681681	2.68866	0.0146969		22.0316	24.8089	25.4849	24.1312	24.1141	1.49434	6.19693	0.0670529		24.7
Ce (140)		51.2353	51.5478	51.3916	0.220977	0.429988	0.0199751		47.8146	50.9077	48.7518	49.4844	49.2396	1.30528	2.65088	0.0377038		53.3
Hf (178)		4.7321	5.08432	4.90821	0.249053	5.07421	0.0323646		3.51452	5.39997	5.01501	4.65604	4.64639	0.813424	17.5066	0.0739482		4.84
Pb (208)		10.5451	10.7324	10.6387	0.132489	1.24534	0.0882638		9.80395	10.765	10.5388	10.1296	10.3093	0.427423	4.14598	0.171898		11
Th (232)		5.75555	5.40658	5.58106	0.246756	4.42131	0.00776503		5.25634	5.65198	4.99278	6.09091	5.498	0.4792	8.71589	0.0192577		5.9
U (238)		1.61616	1.64301	1.62959	0.0189842	1.16497	0.00742635		1.6441	1.73617	1.4219	1.56389	1.59152	0.133198	8.36925	0.0274486		1.69

## Sheet: G51097
Carvalho, B.B., et al., 2023, Revealing the link between A-type granites and hottest melts from residual metasedimentary crust: Geology, https://doi.org/10.1130/G51097.1
